# Supplementary material for: Development of a coumarin-based Schiff base fluorescent probe and its application in detection of Cu²⁺
Source: Research Square preprint supplement (doi:10.21203/rs.3.rs-5440517/v1), 2024-12-04
Supplement: Supplementary file 1 [file 699c123e16fba8d521d56311.docx]

**Supporting Information**

Development of a coumarin-based Schiff base fluorescent probe and its application in detection of Cu²⁺

Xinli Yang 1,Qiurui Ma 1,Yingying Zhao 1

*1 College of Chemistry and Chemical Engineering, Henan University of Technology, Zhengzhou 450001, China*

***Corresponding author**: Yingying Zhao, [zhaoyy@haut.edu.cn](mailto:zhaoyy@haut.edu.cn)

**Calculation of detection limit**

The detection limits of **M** for Cu2+ was calculated by the following formula (1):

（1）

where σ is the standard deviation of 10 times the intensity of free **M**, and S is the slope of the emission intensity of **M** as a function of the Cu2+ concentration.

**Calculation of association constant**

The association constant between **M** and Cu2+ was calculated by the following formula (2):

（2）

where ΔF =F - F0 and ΔFmax = F0 – Fmax. With F0, F and Fmax being the fluorescence intensities of the free **M**, at various concentration of Cu2+ and at the maximum concentration of Cu2+ respectively.

**Theoretical calculation**

The molecular structures of **M** and **M**+Cu2+ were optimized using the B3LYP functional and the mixed basis sets 3-21G* in Gaussian 09 program, employing density functional theory (DFT) combined with time-dependent density functional theory (TD-DFT) for structure optimization and energy calculation.

Through frequency calculation, it was ensured that no virtual frequency exists in all optimized structures.


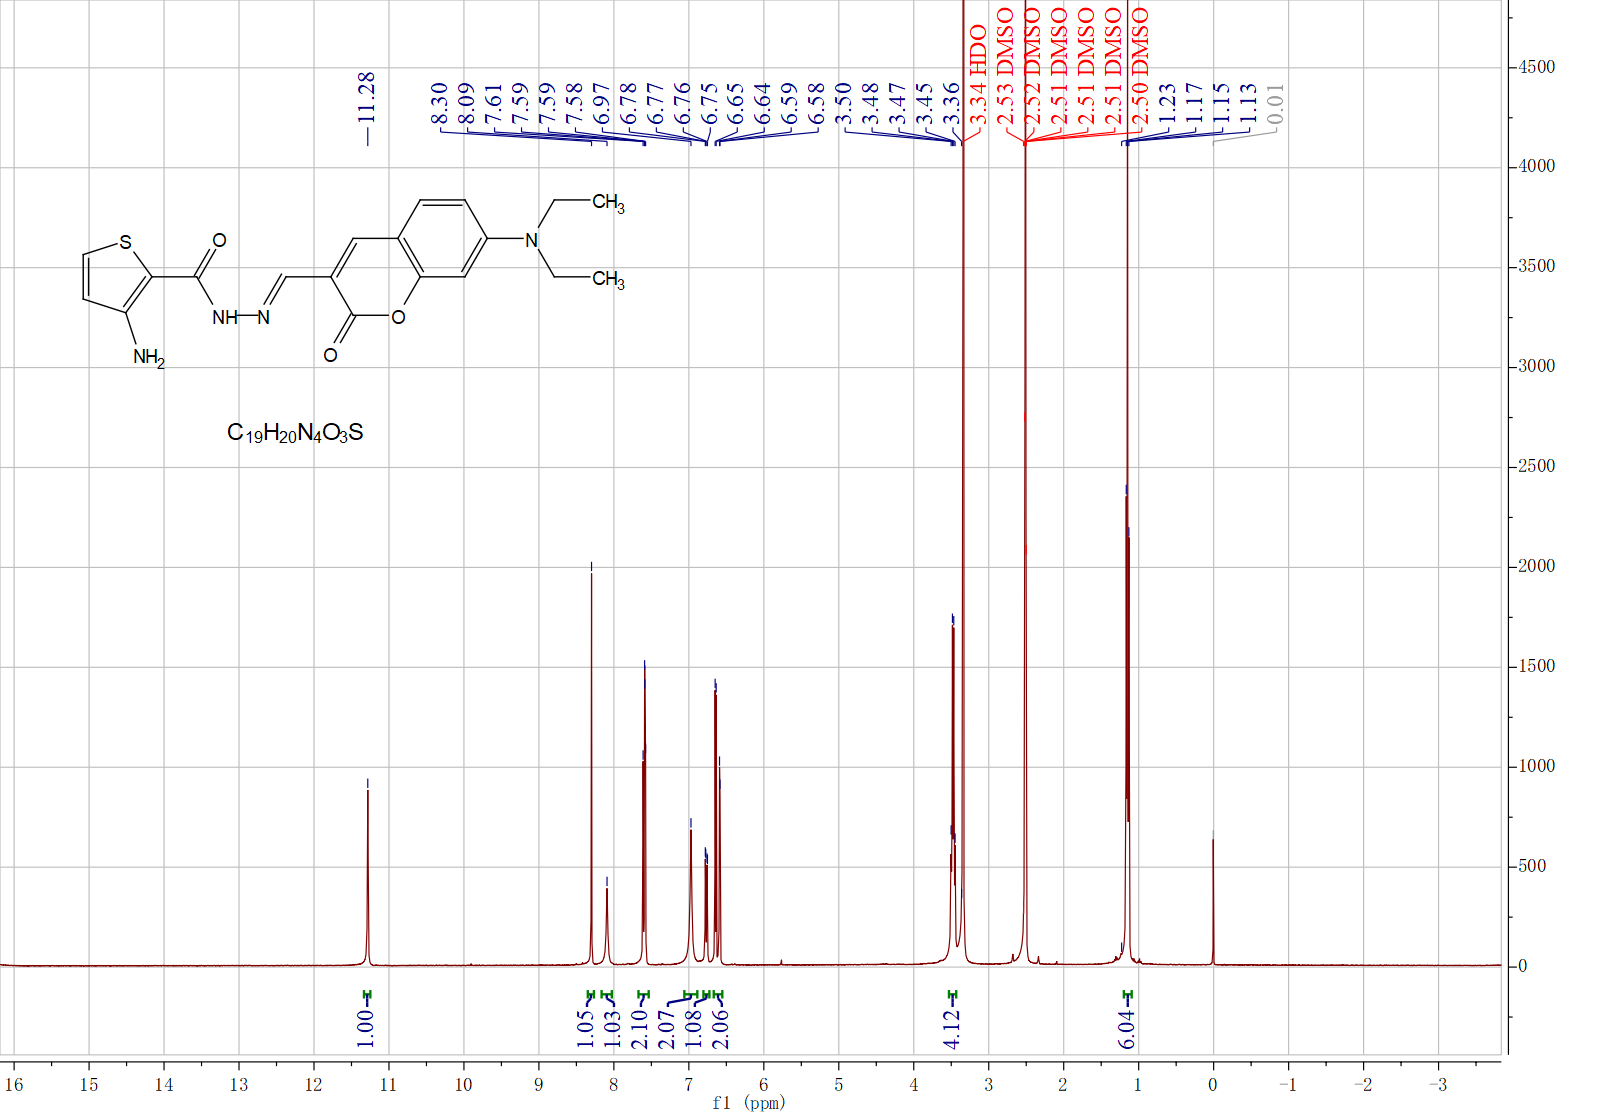


Figure S1. 1H NMR in DMSO-d6 spectrum of **M**.


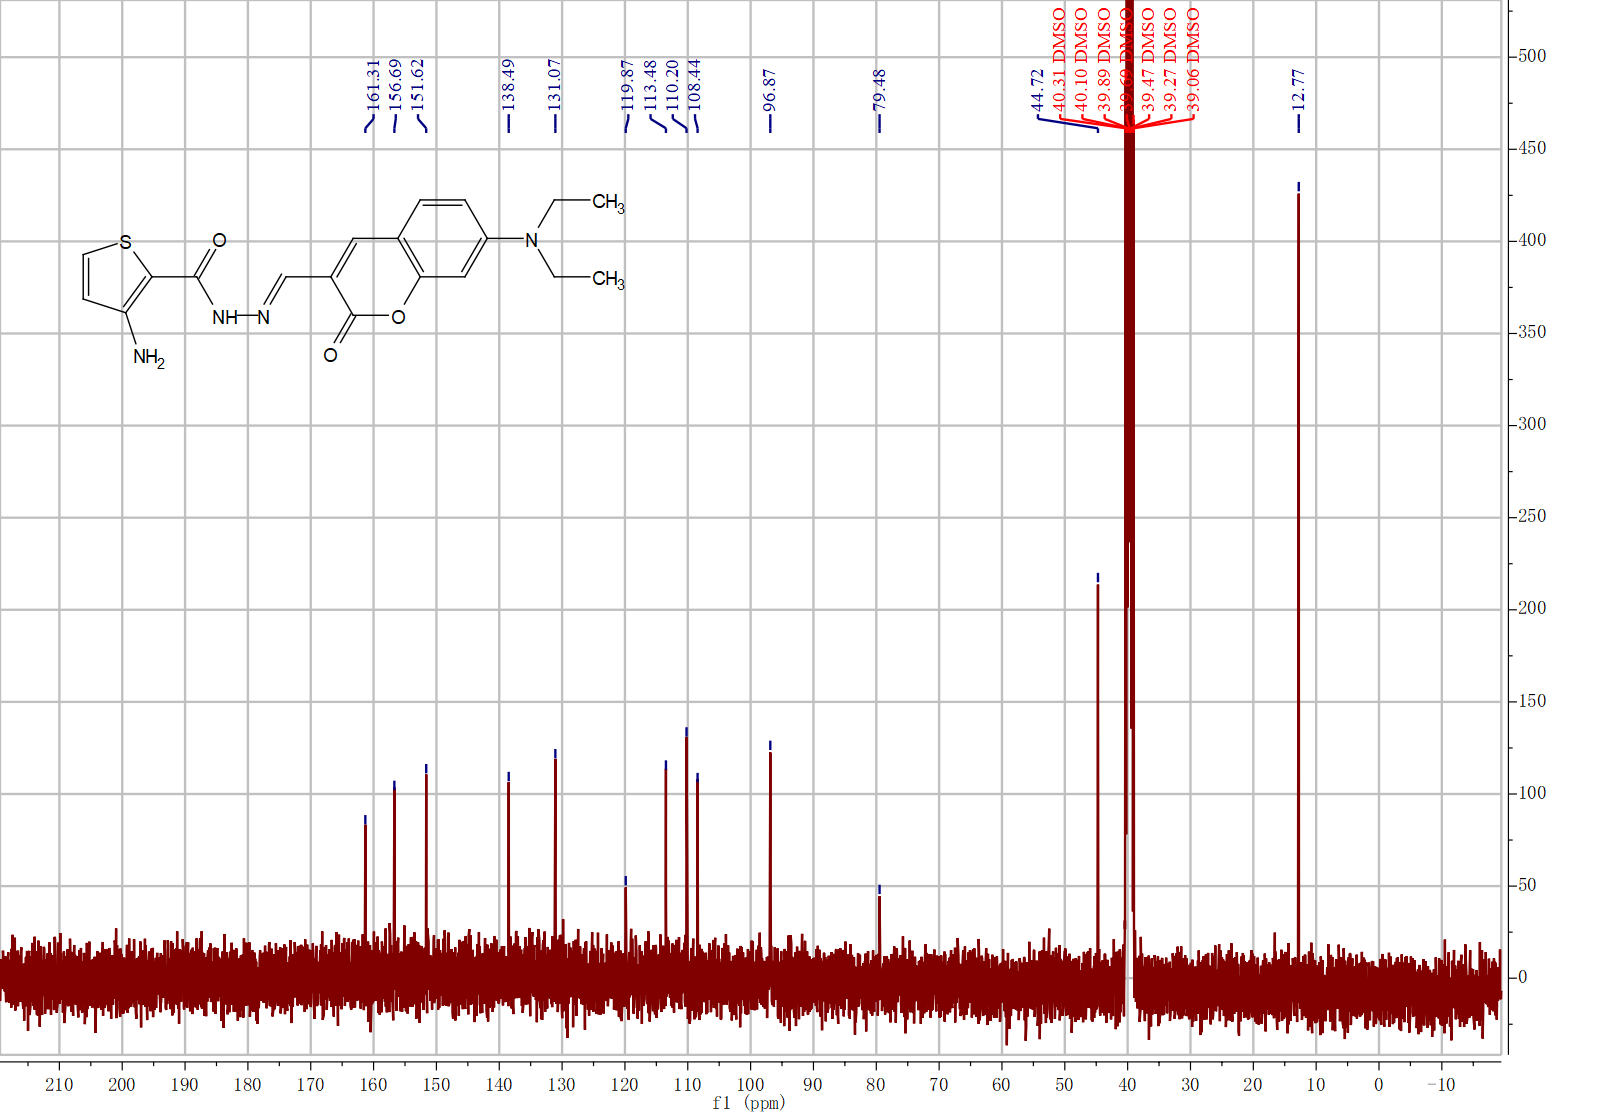


Figure S2. 13C NMR in DMSO-d6 spectrum of **M**.
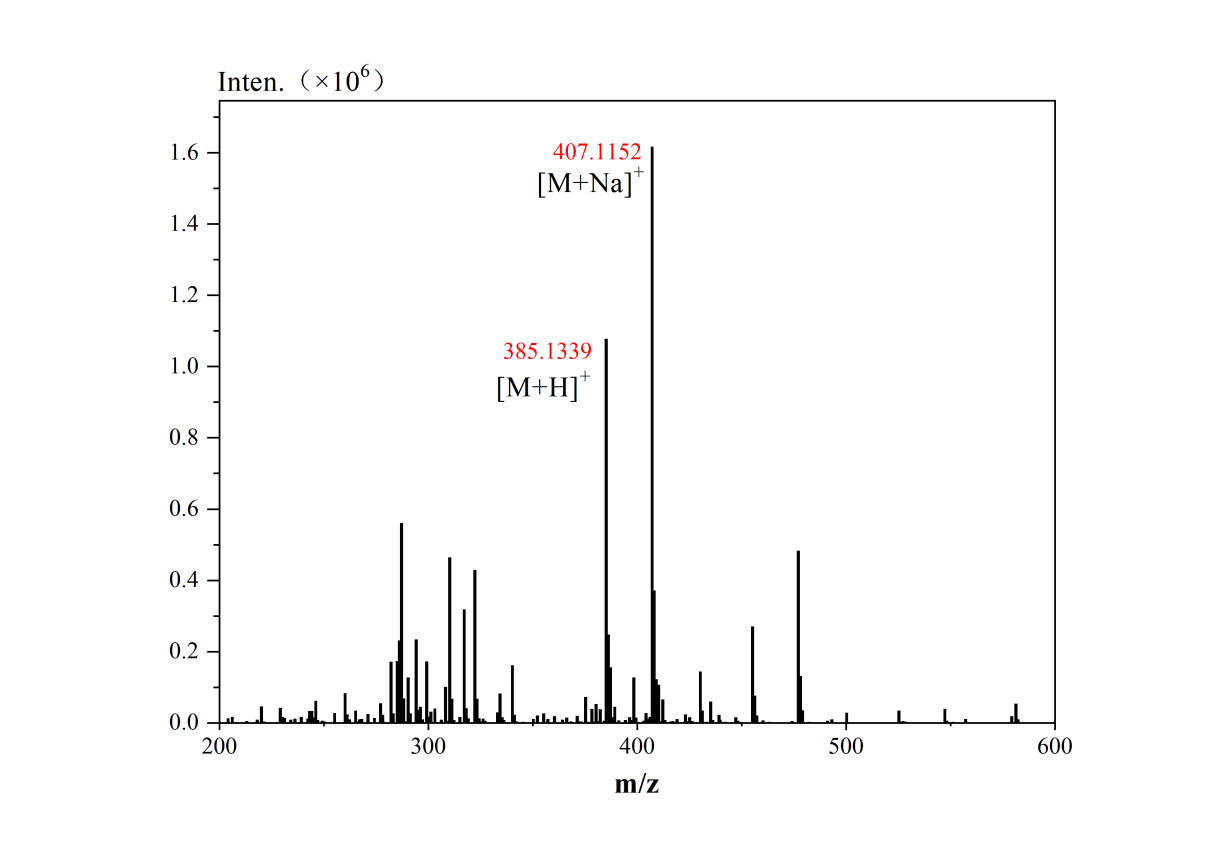


Figure S3. ESI-MS spectrum of probe **M**.


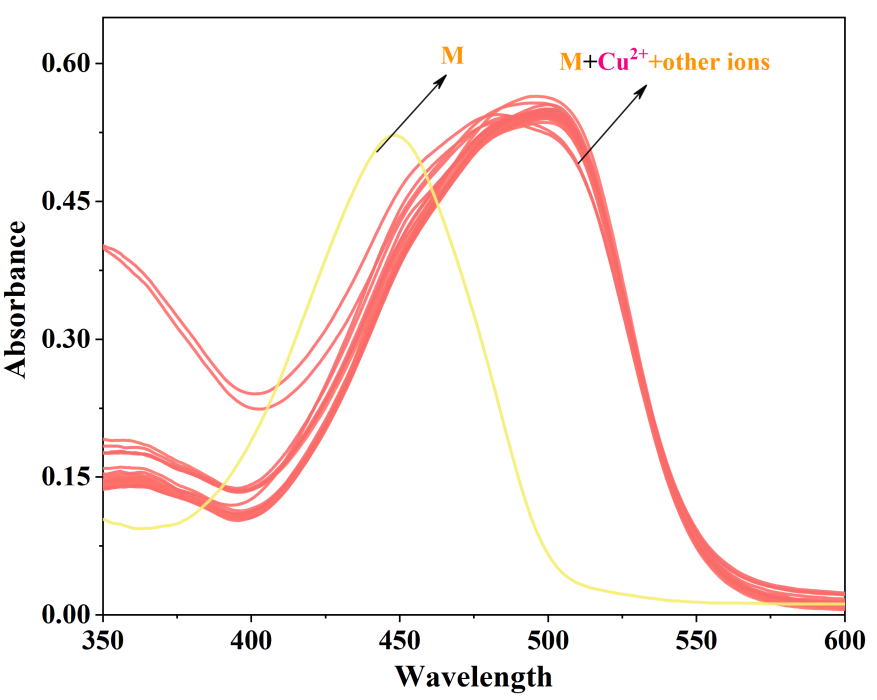


Figure S4. UV-vis absorption spectra of **M** mixed with various metal ions in THF/H2O Tris buffer (v/v=9:1, 0.01 M, pH=7.4) were recorded in the presence of Cu2+.


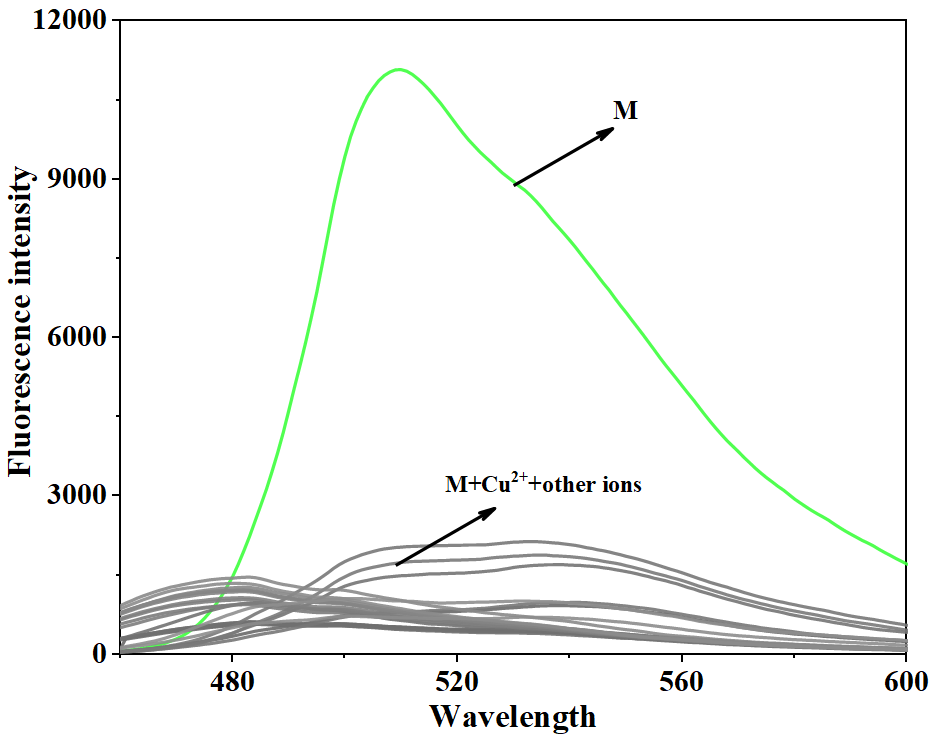


Figure S5. Fluorescence emission spectra of **M** in the presence of various metal ions were recorded in THF/H2O Tris buffer (v/v=9:1, 0.01 M, pH=7.4), with a particular focus on Cu2+.


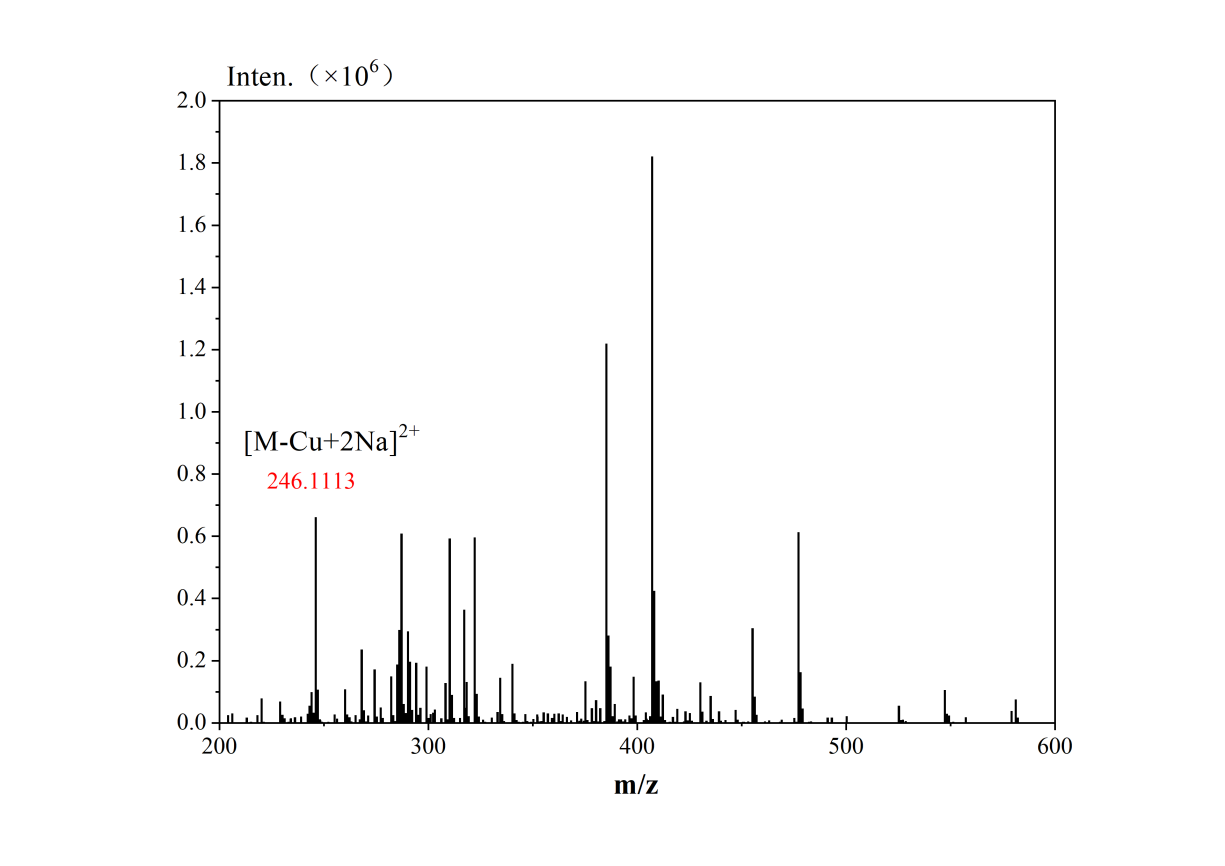


Figure S6. ESI-MS spectrum of probe **M** with addition of Cu2+.


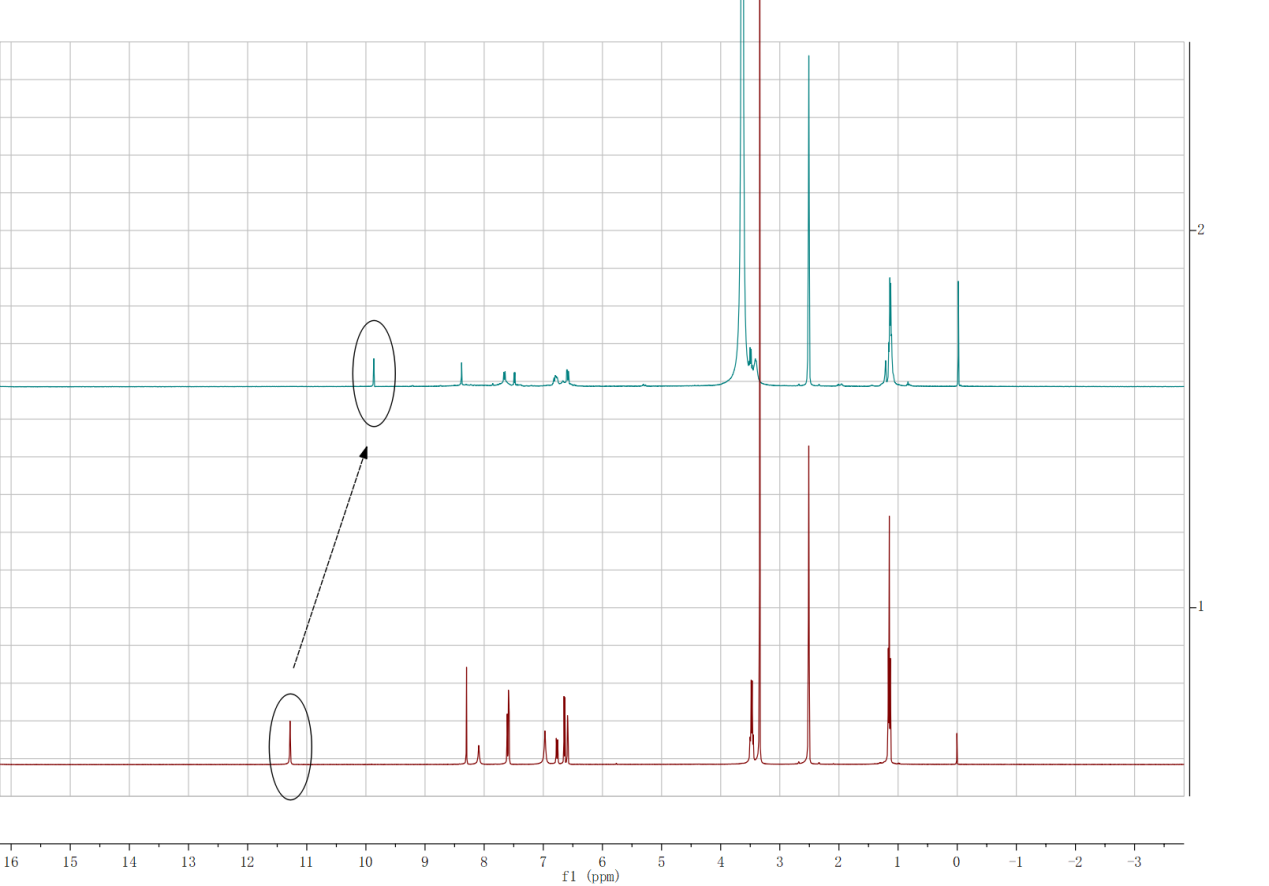


Figure S7. 1H NMR of compound **M** after adding Cu2+ to DMSO‑d6.


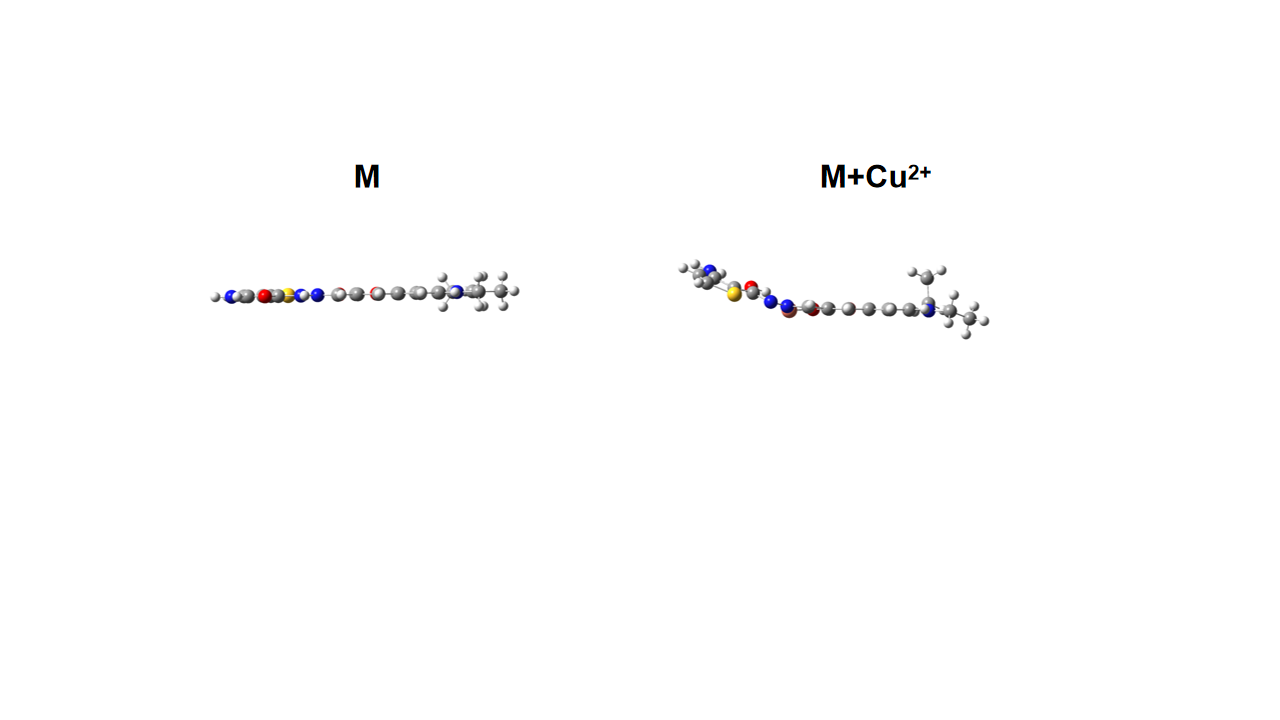


Figure S8. The planar structure of **M** and **M** complexed with Cu2+.
